# Supplementary material for: Exfoliation in a low boiling point solvent and electrochemical applications of MoO3
Source: publisher site journal article supplement (doi:10.3762/bjnano.11.52), 2020-04-17
Supplement: Additional file 1 [file 2190-4286-11-52-S1.pdf]

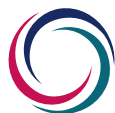

## Supporting Information

for

### Exfoliation in a low boiling point solvent and electrochemical applications of MoO<sub>3</sub>

Matangi Sricharan, Bikesh Gupta, Sreejesh Moolayadukkam  
and H. S. S. Ramakrishna Matte

*Beilstein J. Nanotechnol.* **2020**, *11*, 662–670. [doi:10.3762/bjnano.11.52](https://doi.org/10.3762/bjnano.11.52)

## Additional experimental data

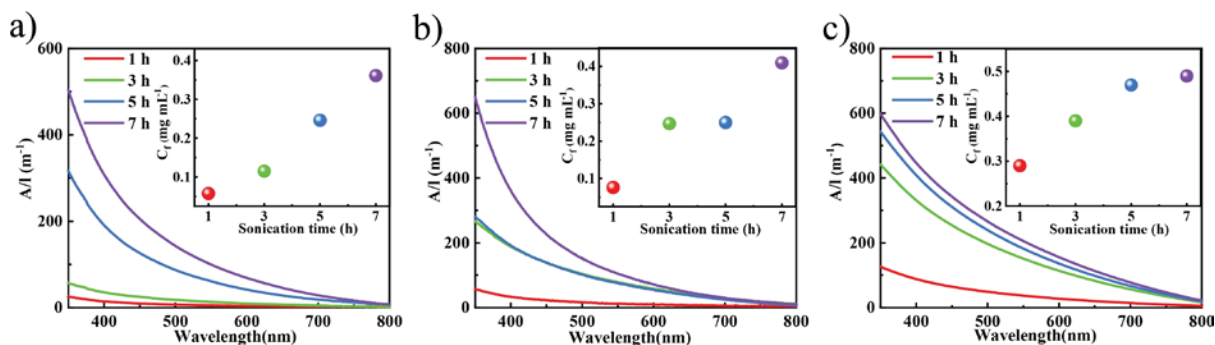

**Figure S1:** UV-vis spectra of MoO<sub>3</sub> dispersions obtained from C<sub>i</sub> of (a) 5 mg·mL<sup>-1</sup> (b) 7.5 mg·mL<sup>-1</sup> and (c) 20 mg·mL<sup>-1</sup>.

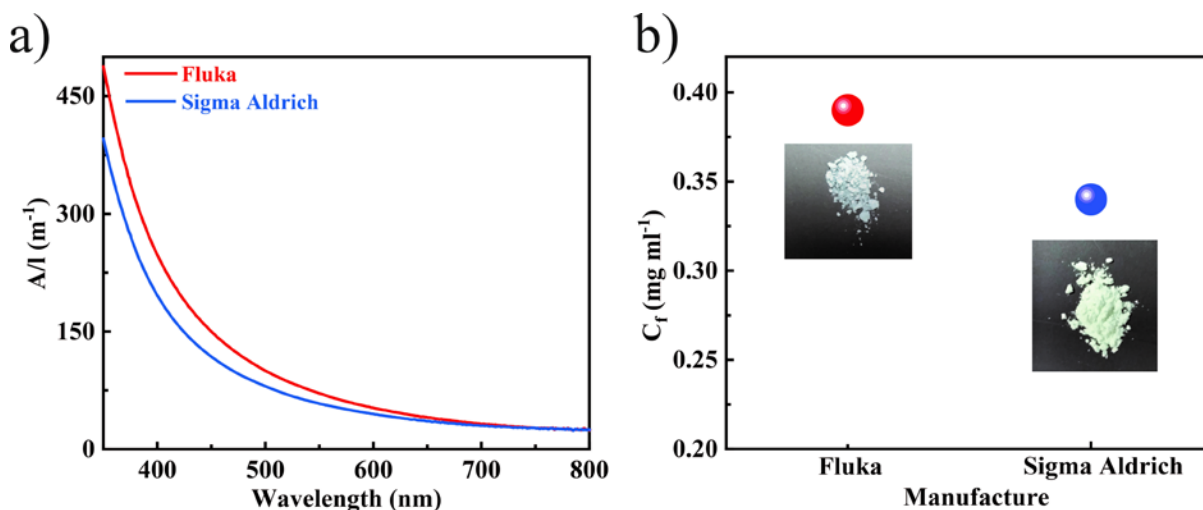

**Figure S2:** (a) UV-vis spectra of MoO<sub>3</sub> dispersions with MoO<sub>3</sub> procured from two different sources (Fluka and Sigma-Aldrich). MoO<sub>3</sub> exfoliation was carried out in 2-butanone with C<sub>i</sub> of 10 mg·mL<sup>-1</sup> and 3 h of sonication. (b) C<sub>f</sub> of MoO<sub>3</sub> dispersions obtained from different manufacturers. Insets show digital micrographs of the MoO<sub>3</sub> powders obtained from different manufacturers.

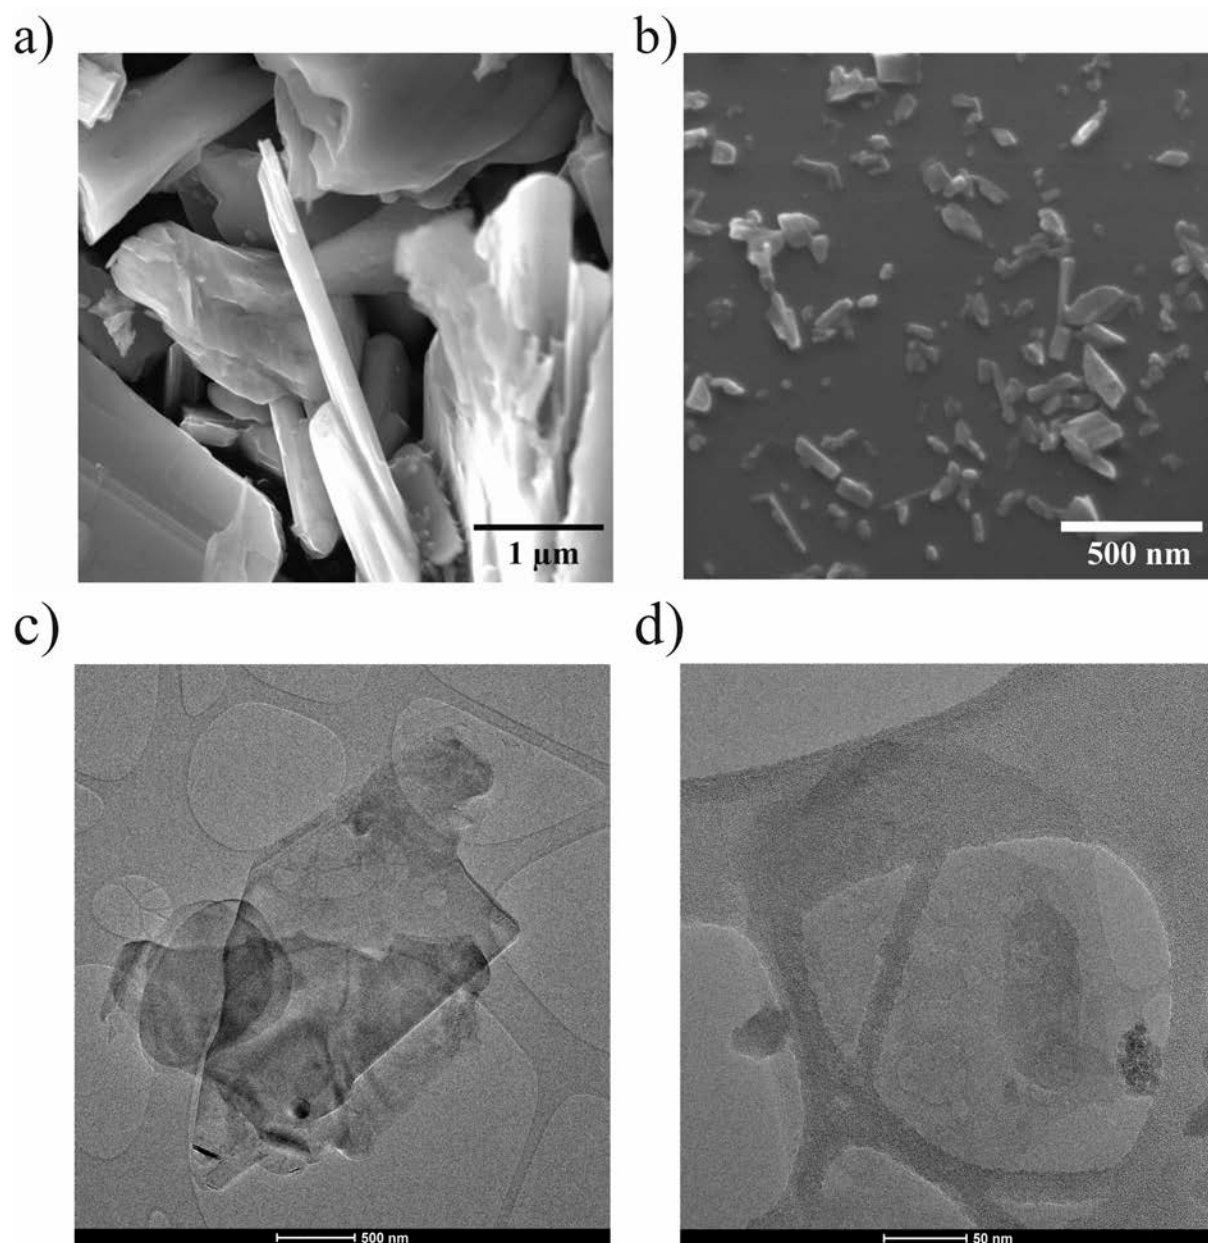

**Figure S3:** FESEM micrographs of (a) bulk and (b) exfoliated MoO<sub>3</sub>; (c, d) TEM micrographs of exfoliated MoO<sub>3</sub> nanosheets.

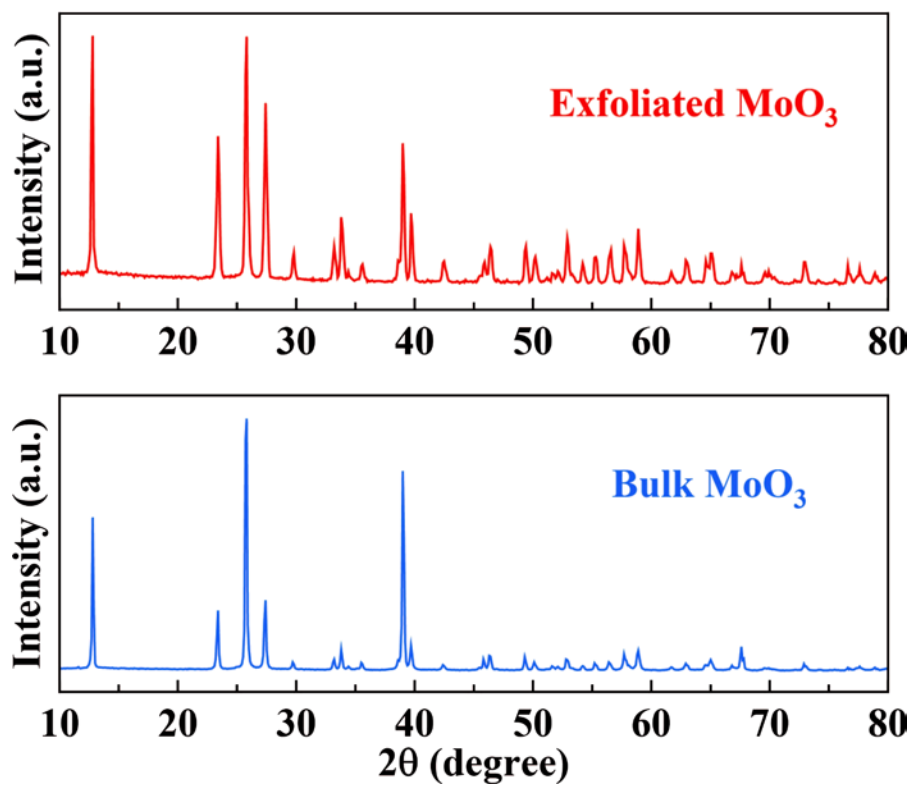

**Figure S4:** XRD of bulk and exfoliated MoO<sub>3</sub>.

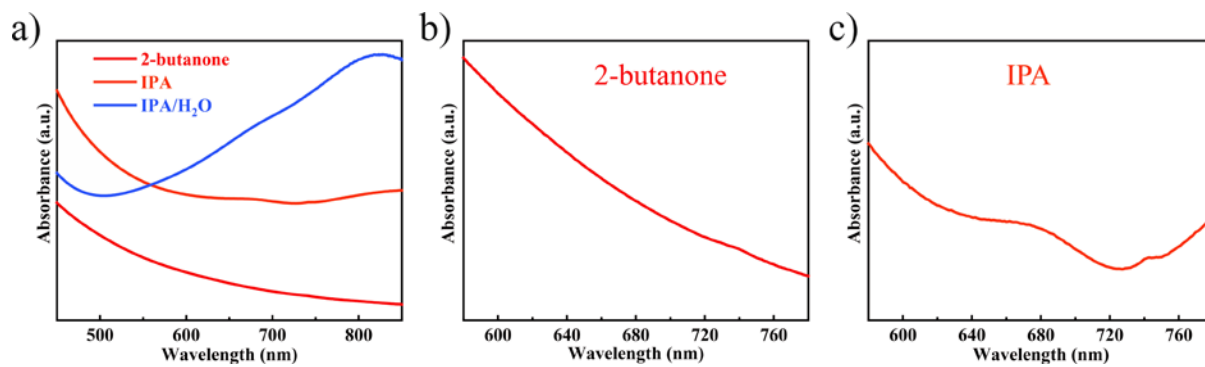

**Figure S5:** (a) UV-vis spectra of MoO<sub>3</sub> in 2-butanone, IPA and IPA/H<sub>2</sub>O. (b) Enlarged view of the UV-vis spectrum in 2-butanone. (c) Enlarged view of the UV-vis spectrum in IPA.

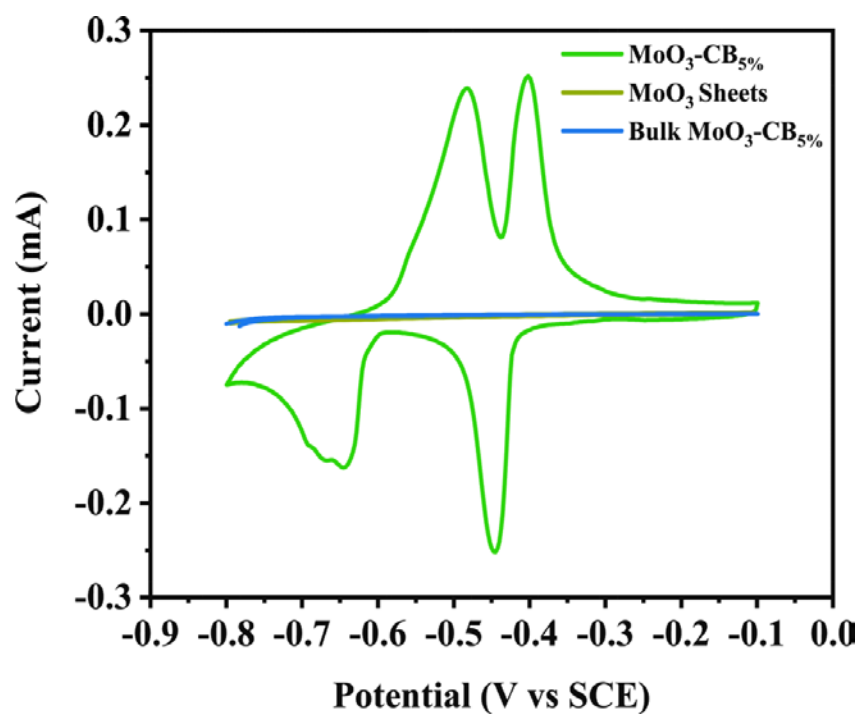

**Figure S6:** CV measurement comparing the performance of exfoliated MoO<sub>3</sub>, the composite of exfoliated MoO<sub>3</sub> with 5 wt % CB and the composite of bulk MoO<sub>3</sub> with 5 wt % CB.

**Table S1:** Comparison of HSP values of 2-butanone and MoO<sub>3</sub>.

| Hansen solubility parameters              | MoO <sub>3</sub> [1] | 2-Butanone |
|-------------------------------------------|----------------------|------------|
| Range of $\delta_D$ (MPa <sup>1/2</sup> ) | 17.8                 | 16         |
| Range of $\delta_P$ (MPa <sup>1/2</sup> ) | 8                    | 9          |
| Range of $\delta_H$ (MPa <sup>1/2</sup> ) | 6.5                  | 5.1        |

**Table S2:** Comparison of the specific capacitance of various MoO<sub>3</sub> structures and composites.

| Material                                                              | Specific capacitance (F·g <sup>-1</sup> ) | Reference        |
|-----------------------------------------------------------------------|-------------------------------------------|------------------|
| MoO <sub>3</sub> nanoparticles distributed uniformly in carbon matrix | 179 @ 50 mA/g                             | [2]              |
| MoO <sub>3</sub> nanowires                                            | 100 @ 200 mA/g                            | [3]              |
| MoO <sub>3</sub> nanorod                                              | 30 @ 5 mV/s                               | [4]              |
| Polypyrrole-coated α-MoO <sub>3</sub>                                 | 125 @ 100 mA/g                            | [5]              |
| ZnO@MoO <sub>3</sub> core/shell nanocables                            | 236 @ 5 mV/s                              | [6]              |
| MoO <sub>3</sub> -MWCNT nanocomposites                                | 210 @ 5 mV/s                              | [7]              |
| <b>MoO<sub>3</sub>-carbon black</b>                                   | <b>201 @ 50 mV/s</b>                      | <b>This work</b> |

## References

1. Alsaif, M. M. Y. A.; Field, M. R.; Daeneke, T.; Chrimes, A. F.; Zhang, W.; Carey, B. J.; Berean, K. J.; Walia, S.; van Embden, J.; Zhang, B.; Latham, K.; Kalantar-zadeh, K.; Ou, J. Z. *ACS Appl. Mater. Interfaces* **2016**, *8*, 3482–3493. doi:10.1021/acsami.5b12076
2. Tao, T.; Chen, Q. Y.; Hu, H. P.; Chen, Y. *Mater. Lett.* **2012**, *66*, 102–105. doi:10.1016/j.matlet.2011.08.028
3. Liang, R.; Cao, H.; Qian, D. *Chem. Commun.* **2011**, *47*, 10305–10307. doi:10.1039/c1cc14030b
4. Shakir, I.; Shahid, M.; Yang, H. W.; Kang, D. J. *Electrochim. Acta* **2010**, *56*, 376–380. doi:10.1016/j.electacta.2010.09.028
5. Liu, Y.; Zhang, B.; Yang, Y.; Chang, Z.; Wen, Z.; Wu, Y. *J. Mater. Chem. A* **2013**, *43*, 13582–13587. doi:10.1039/c3ta12902k
6. Li, G. R.; Wang, Z. L.; Zheng, F. L.; Ou, Y. N.; Tong, Y. X. *J. Mater. Chem.* **2011**, *21*, 4217–4221. doi:10.1039/c0jm03500a
7. Shakir, I.; Shahid, M.; Cherevko, S.; Chung, C. H.; Kang, D. J. *Electrochim. Acta* **2011**, *58*, 76–80. doi:10.1016/j.electacta.2011.08.076
